# Supplementary material for: Antiviral mechanism change of poly(styrene sulfonate) through gold nanoparticle coating
Source: Royal Society of Chemistry journal article supplement (doi:10.1039/d3py01217d), 2024-01-01
Supplement: d3py01217d1.pdf [file d3py01217d1.pdf]

# Antiviral mechanism change of poly(styrene sulfonate) through gold nanoparticle coating

Lorraine M. Bhebhe,<sup>†,¶</sup> Jungyeon Kim,<sup>†,¶</sup> Luke M. Jones,<sup>†</sup> Elana H. Super,<sup>†</sup> and  
Samuel T. Jones<sup>\*,†,‡</sup>

<sup>†</sup>*Department of Materials and Henry Royce Institute, University of Manchester,  
Manchester, United Kingdom, M13 9PL*

<sup>‡</sup>*School of Chemistry, University of Birmingham, Edgbaston, B15 2TT*

<sup>¶</sup>*Authors contributed equally to this work*

E-mail: s.t.jones.1@bham.ac.uk

Table 1: Zeta potential of **PSS-AuNP** measured with a 2mg/mL solution of Au-NPs in deionised water

|          | Zeta Potential (mV, 2 dp) | Mobility ( $\mu\text{mcm/Vs}$ , 2dp) |
|----------|---------------------------|--------------------------------------|
| PSS-AuNP | -53.63 (SD +/- 1.10)      | -4.20 (SD +/- 0.09)                  |

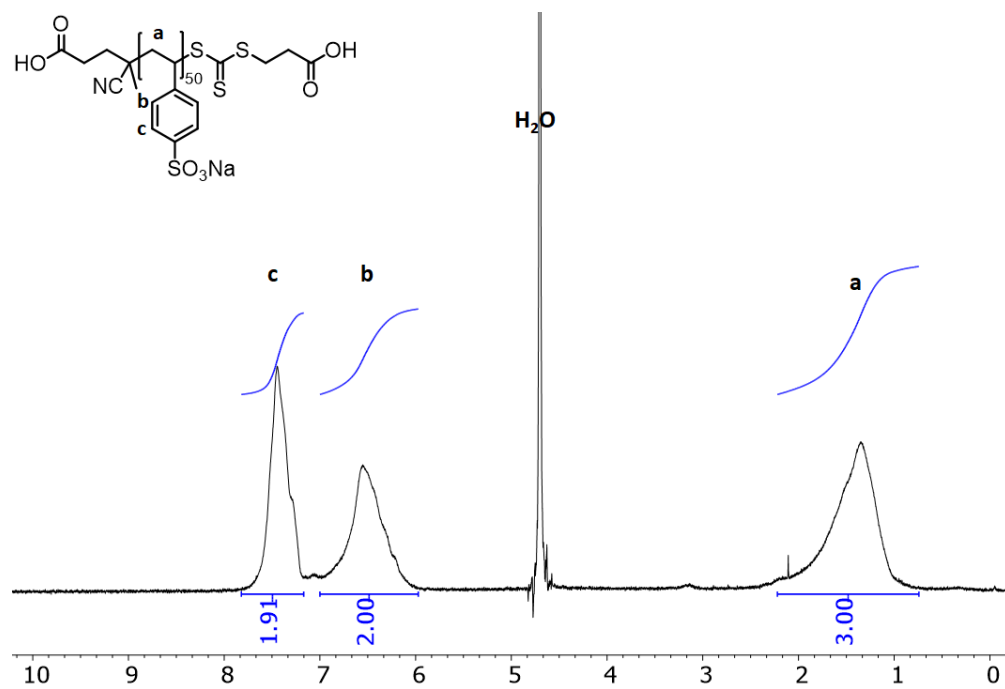

Figure S1:  $^1\text{H}$  NMR of L-PSS measured in  $\text{D}_2\text{O}$

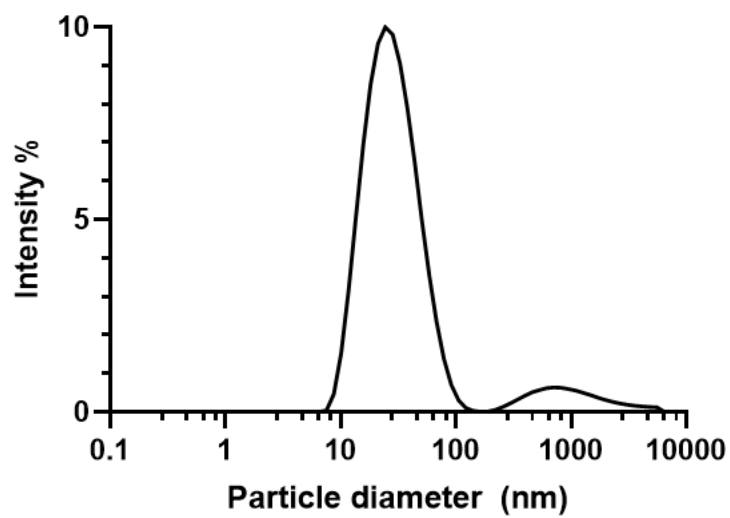

Figure S2: Intensity DLS plot of PSS-AuNP measured in deionised water.



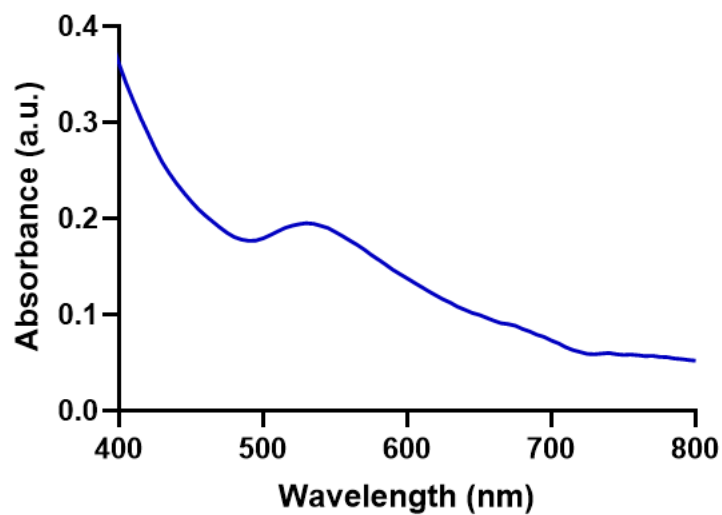

Figure S3: UV/vis spectrum of **PSS-AuNP** (2mg/mL) showing an absorbance  $\lambda=530$  nm

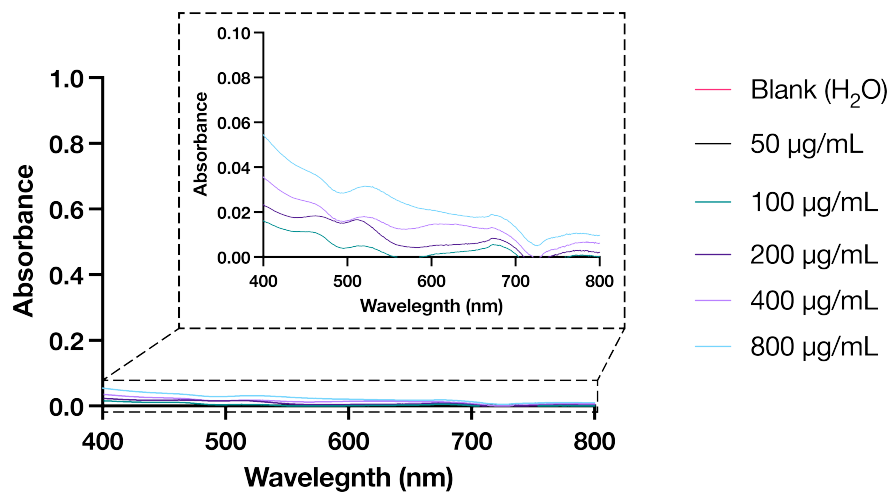

Figure S4: UV/vis spectrum of **PSS-AuNP** from 800µg/mL to 50 µg/mL with minimal absorbance at  $\lambda=490$  nm across all samples, showing that these concentrations do not affect the MTS assay readings.

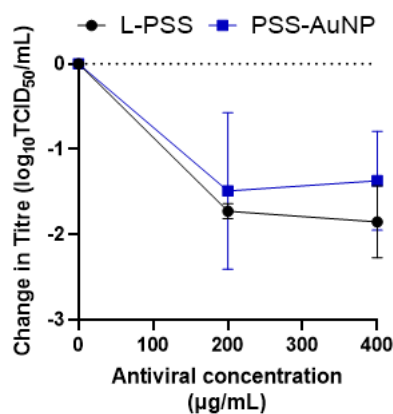

Figure S5: TCID<sub>50</sub> values for **L-PSS** and **PSS-AuNP** incubated with RSV for 1 hour at 37 °C

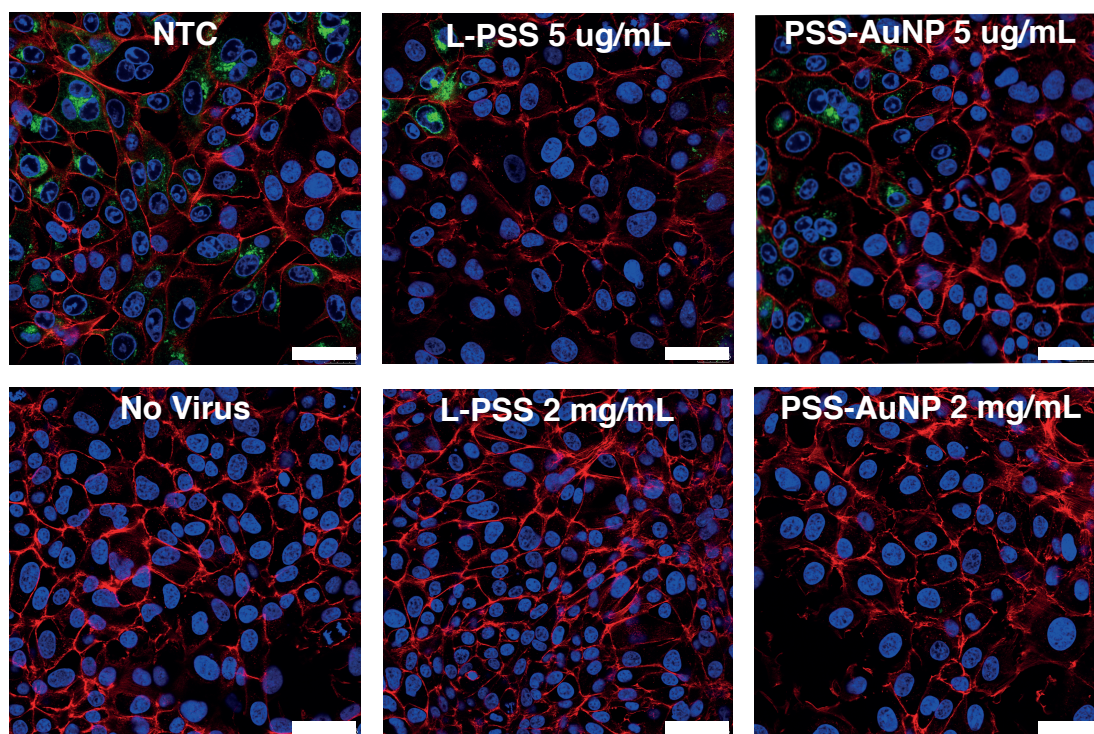

Figure S6: HSV-2 was mixed in a 1:1 ratio with liquid solutions of L-PSS and PSS-AuNP at varying concentrations. Coverslips were fixed after 24 hours and labelled for viewing via confocal microscopy. Virus is prevalent across the monolayer in the no-treatment control (NTC), and no virus is present in the no virus control. Some degree of infection is visible for both materials at 5 µg/mL, but no virus is observed at 2 mg/mL concentration. HSV-2 in green, phalloidin in red, cell nuclei in blue. Scale Bars = 50 µm

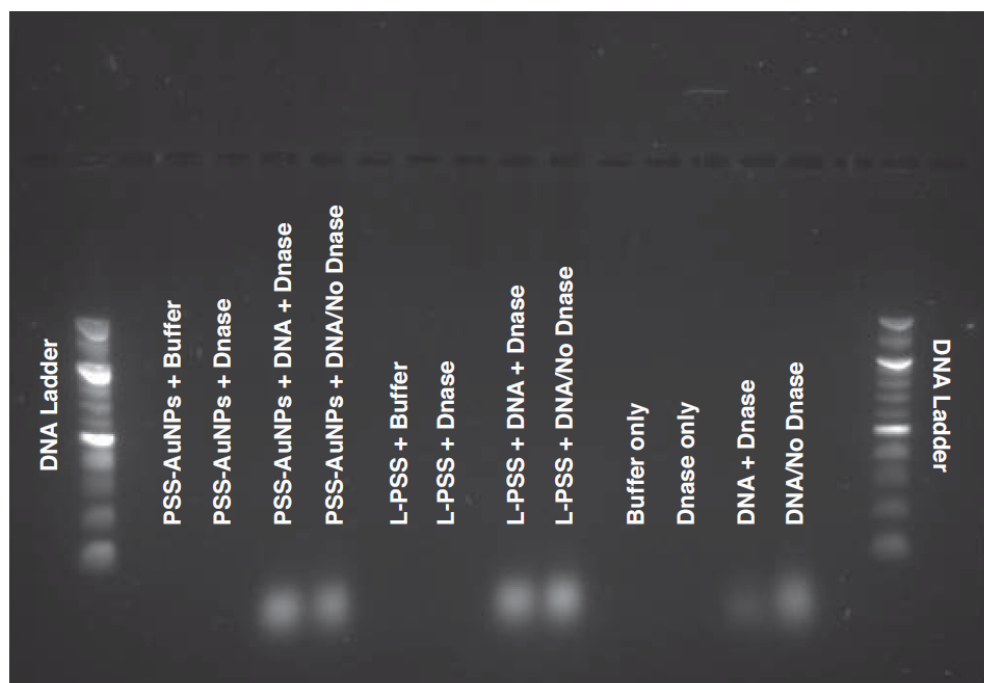

Figure S7: **The effect of PSS materials on DNase.** 5  $\mu$ L of 1 mg/mL DNA (SIGMA 74782) was mixed and incubated with 5  $\mu$ L of 1 mg/mL PSS material or PBS, 17  $\mu$ L DNase (Thermofisher, AM2239) or DNase-free water and 2  $\mu$ L DNase buffer for 1 hr. After deactivation of the DNase per manufacturers instructions, the samples were then run on a 2 wt% agarose gel at 100 volts. As can be seen, the activity of DNase was inhibited in the presence of the PSS materials (DNA concentration in wells containing DNA+material+dnase is comparable to that in wells containing just DNA, and is significantly higher than that in wells containing DNA+DNase without PSS materials). This rendered any attempts at utilising the DNA exposure assay unreliable.
